# Supplementary material for: Antibody-Mediated Autoimmune Encephalopathies and Immunotherapies
Source: PubMed Central journal article supplement (PMC4720680; doi:10.1007/s13311-015-0410-6), 2015-12-21
Supplement: 13311_2015_410_MOESM1_ESM.pdf [file 13311_2015_410_MOESM1_ESM.pdf]

The full content of this file cannot be displayed with your current PDF viewer. Please update to the latest possible version to view this document.
